# Supplementary material
Source: PubMed Central journal article supplement (PMC2048795)
Supplement: plntphys_pp.107.103689_3.pdf [file plntphys_pp.107.103689_3.pdf]

## Supplemental Material

The following materials are available in the online version of this article.

### **Supplemental Figure S1.** Coiling capability of WT, KO and OE strains.

The coiling effect of *T. virens* mycelia of wild-type (WT) and *SMI* deletion (KO25) and over-expression strain (OE38) around hyphae of *R. oryzae* observed on VMS coated microscopic slides. Microscopy was performed with Olympus BX60 microscope at the 100X magnification.

### **Supplemental Table S1.** Growth analysis of WT, KOs and OEs.

<sup>a</sup>The surface area of growth of WT, KOs and OEs in PDA, VMS and WA plates recorded for two days. The data are represented as the ratio of fungal growth area to the total area of the plate in percentages. Each value represents mean growth area with the standard error of four replicates from two independent experiments. Based on ANOVA ( $P < 0.05$ ), there was no significant differences in growth area among these strains on any of the media tested.
