# Supplementary material
Source: PubMed Central journal article supplement (PMC2048795)

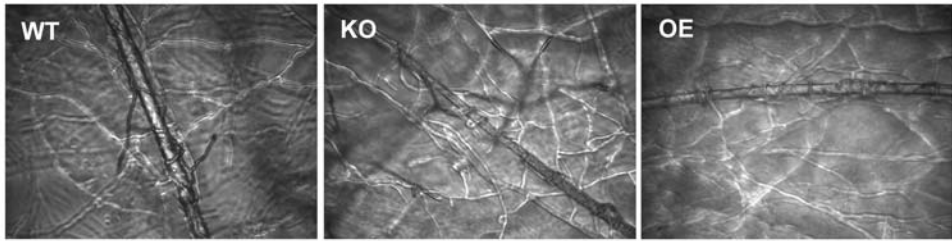

Supplement: plntphys_pp.107.103689_2.pdf [file plntphys_pp.107.103689_2.pdf]
